# Supplementary material for: mCAL: A New Approach for Versatile Multiplex Action of Cas9 Using One sgRNA and Loci Flanked by a Programmed Target Sequence
Source: PubMed Central journal article supplement (PMC4938667; doi:10.1534/g3.116.029801), 2016-05-13
Supplement: supp_g3.116.029801_FileS1.pdf [file supp_g3.116.029801_FileS1.pdf]

## SUPPLEMENTAL REFERENCES

- Aitchison, J. D., M. P. Rout, M. Marelli, G. Blobel and R. W. Wozniak, 1995 Two novel related yeast nucleoporins Nup170p and Nup157p: complementation with the vertebrate homologue Nup155p and functional interactions with the yeast nuclear pore-membrane protein Pom152p. *J Cell Biol* 131: 1133-1148.
- Amberg, D. C., D. J. Burke and J. N. Strathern, 2006 Yeast DNA isolation: miniprep. *CSH Protoc* 2006.
- Boeke, J. D., F. LaCroute and G. R. Fink, 1984 A positive selection for mutants lacking orotidine-5'-phosphate decarboxylase activity in yeast: 5-fluoro-orotic acid resistance. *Mol Gen Genet* 197: 345-346.
- Brachmann, C. B., A. Davies, G. J. Cost, E. Caputo, J. Li *et al.*, 1998 Designer deletion strains derived from *Saccharomyces cerevisiae* S288C: a useful set of strains and plasmids for PCR-mediated gene disruption and other applications. *Yeast* 14: 115-132.
- Braglia, P., R. Percudani and G. Dieci, 2005 Sequence context effects on oligo(dT) termination signal recognition by *Saccharomyces cerevisiae* RNA polymerase III. *J Biol Chem* 280: 19551-19562.
- Christianson, T. W., R. S. Sikorski, M. Dante, J. H. Shero and P. Hieter, 1992 Multifunctional yeast high-copy-number shuttle vectors. *Gene* 110: 119-122.
- DiCarlo, J. E., J. E. Norville, P. Mali, X. Rios, J. Aach *et al.*, 2013 Genome engineering in *Saccharomyces cerevisiae* using CRISPR-Cas systems. *Nucleic Acids Res* 41: 4336-4343.
- Eckert-Boulet, N., M. L. Pedersen, B. O. Krogh and M. Lisby, 2012 Optimization of ordered plasmid assembly by gap repair in *Saccharomyces cerevisiae*. *Yeast* 29: 323-334.
- Fabre, E., and E. Hurt, 1997 Yeast genetics to dissect the nuclear pore complex and nucleocytoplasmic trafficking. *Annu Rev Genet* 31: 277-313.
- Finnigan, G. C., and J. Thorner, 2015 Complex in vivo ligation using homologous recombination and high-efficiency plasmid rescue from *Saccharomyces cerevisiae*. *Bio-protocol* 5: e1521.1-e1521.14.
- Goldstein, A. L., and J. H. McCusker, 1999 Three new dominant drug resistance cassettes for gene disruption in *Saccharomyces cerevisiae*. *Yeast* 15: 1541-1553.
- Horwitz, A.A., J.M. Walter, M.G. Schubert, S.H. Kung, K. Hawkins *et al.*, 2015 Efficient multiplexed integration of synergistic alleles and metabolic pathways in yeasts via CRISPR-Cas. *Cell Systems* 1: 88-96.

- Jiang, W., D. Bikard, D. Cox, F. Zhang and L. A. Marraffini, 2013 RNA-guided editing of bacterial genomes using CRISPR-Cas systems. *Nat Biotechnol* 31: 233-239.
- Jinek, M., K. Chylinski, I. Fonfara, M. Hauer, J. A. Doudna *et al.*, 2012 A programmable dual-RNA-guided DNA endonuclease in adaptive bacterial immunity. *Science* 337: 816-821.
- Kalderon, D., B. L. Roberts, W. D. Richardson and A. E. Smith, 1984 A short amino acid sequence able to specify nuclear location. *Cell* 39: 499-509.
- Sikorski, R. S., and P. Hieter, 1989 A system of shuttle vectors and yeast host strains designed for efficient manipulation of DNA in *Saccharomyces cerevisiae*. *Genetics* 122: 19-27.
- Versele, M., B. Gullbrand, M. J. Shulewitz, V. J. Cid, S. Bahmanyar *et al.*, 2004 Protein-protein interactions governing septin heteropentamer assembly and septin filament organization in *Saccharomyces cerevisiae*. *Mol Biol Cell* 15: 4568-4583.
- Wang, Q., and L. Wang, 2008 New methods enabling efficient incorporation of unnatural amino acids in yeast. *J Am Chem Soc* 130: 6066-6067.
- Zheng, L., U. Baumann and J. L. Reymond, 2004 An efficient one-step site-directed and site-saturation mutagenesis protocol. *Nucleic Acids Res* 32: e115.
