# Supplementary material for: mCAL: A New Approach for Versatile Multiplex Action of Cas9 Using One sgRNA and Loci Flanked by a Programmed Target Sequence
Source: PubMed Central journal article supplement (PMC4938667; doi:10.1534/g3.116.029801), 2016-05-13
Supplement: supp_g3.116.029801_TableS4.pdf [file supp_g3.116.029801_TableS4.pdf]

**Table S4.** Growth results for colonies from controls lacking at least one PCR product.

| Parental Strain     | PCR fragment(s)               | PCR    |        | YPD   | YPD  | Total Colonies |
|---------------------|-------------------------------|--------|--------|-------|------|----------------|
|                     |                               | SD-Ura | SD-His | +G418 | +Hyg |                |
| 2002-B <sup>1</sup> | <i>CDC11</i>                  | +      | -      | +     | -    | 7              |
|                     |                               | +      | -      | +     | +    | 9              |
| 2002-C              | <i>SHS1</i>                   | +      | -      | +     | -    | 2              |
|                     |                               | +      | -      | +     | +    | 7              |
| 2002-D              | -                             | +      | -      | +     | -    | 0              |
|                     |                               | +      | -      | +     | +    | 3              |
| 2003-B <sup>3</sup> | <i>CDC11</i> &<br><i>SHS1</i> | +      | -      | +     | -    | 0              |
|                     |                               | +      | -      | +     | +    | 6              |
| 2003-C              | <i>CDC11</i> &<br><i>HIS3</i> | +      | -      | +     | -    | 2              |
|                     |                               | +      | -      | +     | +    | 7              |
| 2003-D              | <i>SHS1</i> &<br><i>HIS3</i>  | +      | -      | +     | -    | 0              |
|                     |                               | +      | -      | +     | +    | 6              |
| 2003-E              | -                             | +      | -      | +     | -    | 0              |
|                     |                               | +      | -      | +     | +    | 6              |

Clonal isolates were pooled from multiple experimental trials, in which either 500 bps of flanking homology (Fig. 2) or 30 bps of flanking homology (Fig. S3) were used, and replica-plated onto various growth conditions (SD-Ura, SD-His, YPD+G418, and YPD+Hygromycin). A “+” score indicates growth/resistance whereas “-” designates no growth/sensitivity. For the initial genotypes indicated [strain and PCR fragment(s)], two growth patterns were observed and the number of colonies displaying each pattern were totaled (*far right column*). Yeast were also tested on SD-Leu medium for the presence or absence of the high-copy pRS425::sgRNA[u1] vector. After only two rounds of selection on SD-Ura (no selective pressure for the *LEU2* marker), 40/55 strains had lost the sgRNA-expressing plasmid. Representative isolates were taken from each category for further analysis by diagnostic PCR.

<sup>1</sup>B, C, D or E designation is from the experiment in Fig. 2, in which no PCR fragments, one PCR fragment, or two PCR fragments were introduced by transformation, as indicated.

<sup>3</sup>For simplicity, only combinations of two PCR products (omitting a third) were tested for strain GFY-2003, rather than all possible combinations.
