# Supplementary material for: mCAL: A New Approach for Versatile Multiplex Action of Cas9 Using One sgRNA and Loci Flanked by a Programmed Target Sequence
Source: PubMed Central journal article supplement (PMC4938667; doi:10.1534/g3.116.029801), 2016-05-13
Supplement: supp_g3.116.029801_TableS5.pdf [file supp_g3.116.029801_TableS5.pdf]

**Table S5.** Oligonucleotides used in this study.

| Oligonucleotide | Description                          | Sequence (5' to 3')                          |
|-----------------|--------------------------------------|----------------------------------------------|
| F1              | <i>CDC11</i> UTR <sup>1</sup> +406 F | CATCTACAAAAGCAGGTTATAGCTCCG<br>TTAAAC        |
| F7              | <i>CDC11</i> UTR +330 F              | CACAACATGGAACATAACATTTAAACAT<br>CGTTCTCAATC  |
| R1              | <i>CDC11</i> UTR -327 R              | GCTAAGTGATGTTCTGGTCTTTCCAAAA<br>TTCTC        |
| F2              | <i>CDC11</i> UTR +101 F              | GATCGAAAAGTAAAATAGGTAGACACC<br>ACGTATTG      |
| R2              | <i>CDC11</i> Int <sup>2</sup> +75 R1 | CACAGTGAAGGTTATACCTCTTTTCAAA<br>TGCTTTC      |
| F3              | <i>CDC11</i> Int +1233 F             | GAAGCCAGGTTGGAAAAAGAGGCGAAA<br>ATC           |
| R3              | <i>CDC11</i> UTR -89 R               | TAATATACCAGATGTATTTACTTATATAC<br>AACACTCACTC |
| F4              | <i>SHS1</i> UTR +800 F               | CATTACTAGAGTTTGCTGGTGTTCAG<br>ATCG           |
| F8              | <i>SHS1</i> UTR +500 F               | GTTCTCCGGTTTAAACTGATCCATAGT<br>GATAG         |
| R4              | <i>SHS1</i> Int +999 R               | ACGGTAATTCTCGTAAAGCAAATTTTGC<br>GTGG         |
| R5              | Int Hyg R                            | CTCCTACATCGAAGCTGAAAGCACGAG                  |
| F5              | Cas9 Int +2903 F                     | CTGAAGTCTAAGCTGGTCTCAGATTTCA<br>GAAA         |
| F9              | Cas9 Int +3477 F                     | GTGGAGAAAGGGAAGTCTAAAAAACTC<br>AAAAGC        |
| R6              | Int Kan R                            | GAACACTGCCAGCGCATCAACAATATT<br>TTC           |
| F6              | <i>HIS3</i> UTR +992 F               | GGGTCAGTTATTTTCATCCAGATATAACC<br>CG          |
| F10             | <i>HIS3</i> UTR +500 F               | TTCTCGACGTGGGCCTTTTTCTTGCCAT<br>AT           |

---

|     |                        |                                                                          |
|-----|------------------------|--------------------------------------------------------------------------|
| R7  | <i>HIS3</i> UTR -497 R | GTAACCACCACGACGGTTGTTGCTAAA<br>GAA                                       |
| F11 | <i>CDC11</i> UTR +30 F | CACAAGGCCTAAAGTTGCTAACCACCA<br>GCCATGTCCGGAATAATTGACGCATCT<br>TCTGCA     |
| R8  | <i>CDC11</i> UTR -30 R | AAGAAATAAGTGAGGAAGCCAAAAGCG<br>GACTCATTCTTCCTGTTTGATTTTCGCC<br>TCTTTTTCC |
| F12 | <i>SHS1</i> UTR +30 F  | TATAATTGCTAGAAAAATATATTATTAAT<br>CATGAGCACTGCTTCAAC                      |
| R9  | <i>SHS1</i> UTR -30 R  | GCTCAGCTTTGGATTTTGTACAGATACA<br>ACACTGGATGGCGGCGTTAGTATCGAA<br>TC        |
| F13 | <i>HIS3</i> UTR +30 F  | AATGAGCAGGCAAGATAAACGAAGGCA<br>AAG                                       |
| R10 | <i>HIS3</i> UTR -30 R  | GTATGCTGCAGCTTTAAATAATCGGTGT<br>CA                                       |
| F14 | Int Kan F              | CGTTGCATTCGATTCCTGTTTGTAATT<br>GTCC                                      |
| R11 | <i>SHS1</i> UTR -469 R | CCACTAGAGCATTGGCAGAATTATATG<br>GTAGT                                     |

---

<sup>1</sup>UTR +/- designates sequence upstream (5') or downstream (3') of the specified gene.

<sup>2</sup>"Int" designates a position internal to the coding sequence of the specified ORF.
