# Supplementary material for: mCAL: A New Approach for Versatile Multiplex Action of Cas9 Using One sgRNA and Loci Flanked by a Programmed Target Sequence
Source: G3 (Bethesda). 2016 May 13;6(7):2147–56. doi: 10.1534/g3.116.029801 (PMC4938667; doi:10.1534/g3.116.029801)
Supplement: Supplemental Material [file supp_g3.116.029801_TableS2.pdf]

**Table S2.** Plasmids used in this study.

| Plasmid                 | Description                                                                                              | Reference                         |
|-------------------------|----------------------------------------------------------------------------------------------------------|-----------------------------------|
| pRS425                  | 2 $\mu$ ; <i>LEU2 AMP</i>                                                                                | (CHRISTIANSON <i>et al.</i> 1992) |
| pRS423                  | 2 $\mu$ ; <i>HIS3 AMP</i>                                                                                | (CHRISTIANSON <i>et al.</i> 1992) |
| pRS316                  | CEN; <i>URA3 AMP</i>                                                                                     | (SIKORSKI AND HIETER 1989)        |
| pSB1/JT1520             | CEN; <i>URA3 AMP</i> ; <i>prCDC11::CDC11</i> <sup>1</sup>                                                | (VERSELE <i>et al.</i> 2004)      |
| pGF-V796 <sup>2</sup>   | pRS425; sgRNA[u1]                                                                                        | This study                        |
| pGF-V798 <sup>3</sup>   | pRS423; sgRNA[u2]                                                                                        | This study                        |
| pGF-IVL977 <sup>4</sup> | <i>prHIS3::u2::prGAL1/10::S.p.Cas9::NLS::Linker::eGFP::NL S::ADH(t)::Kan<sup>R</sup>::u2::HIS3-3'UTR</i> | This study                        |
| pGF-V789 <sup>5</sup>   | pRS316; <i>prGAL1/10::S.p.Cas9::NLS::CDC10-3'UTR</i>                                                     | This study                        |

<sup>1</sup>There is no *CDC11* 3'-UTR present within this vector.

<sup>2</sup>The sgRNA[u1]-expressing cassette is under control of the snoRNA *SNR52* promoter and *SUP4* terminator sequences (DICARLO *et al.* 2013). The u1 target sequence is CGGTGGACTTCGGCTACGTA. The entire sgRNA-expressing cassette was synthesized (GenScript, Piscataway, NJ) with flanking *Bam*HI and *Xho*I restriction sites in the vector pUC57 (GenScript Cat. No. SD1176; GenBank Y14837.1; A. Markauskas and G. Dreguniene, unpublished) and subcloned to pRS425 followed by sequence verification.

<sup>3</sup>The sgRNA[u2]-expressing cassette was mutated from the u1 sequence within pUC57 through successive rounds of PCR mutagenesis (ZHENG *et al.* 2004) to generate a u2 target sequence of GCTGTTCGTGTGCGCGTCCT followed by a final subcloning into vector pRS423.

<sup>4</sup>Plasmid pGF-IVL977 was constructed by first creating a parent vector by *in vivo* ligation and homologous recombination in yeast (FINNIGAN AND THORNER 2015) of the genotype: *prHIS3::u2::prGAL1/10::NotI restriction site::ADH1(t)::KanR::u2::HIS3-3'UTR* (pGF-IVL974). Next, a second round of *in vivo* ligation in yeast was used to insert the *S.p.Cas9::NLS::Linker::eGFP::NLS* sequence. The flexible linker has the sequence SGGGSG and the SV40 NLS sequence (KALDERON *et al.* 1984) is SRADPKKKRKV and is found after both the Cas9 and eGFP sequences. Under identical induction and growth conditions, a similar construct (pGF-IVL976) with only a single SV40 NLS present between Cas9 and a C-terminal eGFP tag did not yield as strong of a fluorescent signal within yeast cell nuclei compared to the

pGF-IVL977 construct containing two SV40 nuclear localization signals.

<sup>5</sup>This vector was constructed first by *in vivo* ligation in pRS315 to fuse the *prGAL1/10* promoter, Cas9 gene, *CDC10* 3'-UTR terminator (465 bps), and the Kan<sup>R</sup> cassette with a unique *SpeI* site present between the terminator and drug cassette. A unique *NotI* site (upstream of the *prGAL1/10* sequence) was used to subclone the *prGAL1/10::Cas9::NLS::CDC10(t)* sequence to the same sites in pRS316 to yield pGF-V789.
